# Supplementary material for: Association, Conformational Rearrangements and the Reverse Process of Aggregates Dissociation during Apomyoglobin Amyloid Formation
Source: MDPI journal article supplement (doi:10.3390/physchem3030021), 2023-07-24
Supplement: s1 [file s1]

## SUPPORTING INFORMATION

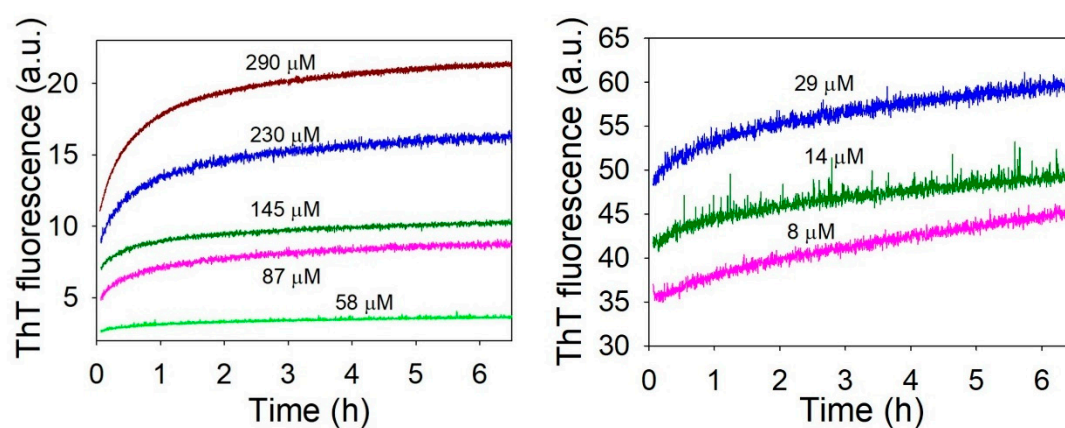

**Figure S1.** Kinetics of ApoMb V10F amyloid aggregation at various protein concentrations.

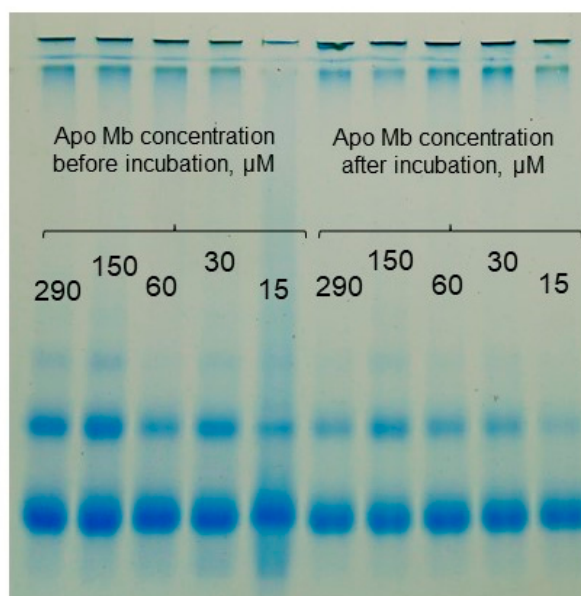

**Figure S2.** Electrophoregram of WT ApoMb solutions before and after 24 h incubation at 40°C at different protein concentrations. The protein amount applied to the well was the same for all samples.
